# Supplementary material
Source: publisher figshare collection journal article supplement (https://frontiersin.figshare.com/ndownloader/files/31465883)
Supplement: Supplementary file [file 31465883]

**Supplementary Table 4. The effectiveness of the CSF1R inhibitors on microglia depletion, amyloid/tau pathology and synaptic function in the text.**

| <b>CSF1R inhibitor</b> | <b>Percentage of Microglial depletion</b>       | <b>Amyloid /tau pathology</b>                           | <b>Synaptic function</b>                     | <b>Mouse model</b>                            | <b>References</b>        |
|------------------------|-------------------------------------------------|---------------------------------------------------------|----------------------------------------------|-----------------------------------------------|--------------------------|
| <b>PLX5622</b>         | Extensive microglial depletion                  | Reduced plaques in the visual cortex                    | Prevent perineuronal nets (PNNs) loss        | 5×FAD                                         | Crapser et al., 2020     |
|                        | Low dose: 30% microglia                         | Prevent microglial association with plaques             | NA                                           | 3×Tg-AD                                       | Dagher et al., 2015      |
|                        | 90%                                             | Impair parenchymal plaque development                   | NA                                           | 5×FAD                                         | Spangenberg et al., 2019 |
|                        | Almost completely (1200 mg/kg) ablated          | Not alter plaque load                                   | Less effective in altering synaptic function | App <sup>NL-F</sup> and App <sup>NL-G-F</sup> | Benitez et al., 2021     |
|                        | over 50%                                        | Reduce plaque burden                                    | Enhance neuritic dystrophy                   | 5×FAD                                         | Casali et al., 2020      |
|                        | Almost completely absent                        | Increase plaque deposition; reduce propagation of p-tau | NA                                           | App <sup>NL-G-F</sup>                         | Clayton et al., 2021     |
| <b>PLX3397</b>         | ~80%                                            | Not mediate or protect from amyloid pathology           | Prevent neuronal loss                        | 5×FAD                                         | Spangenberg et al., 2016 |
|                        | ~81% reduction of microglial area in the cortex | Attenuation of amyloid-facilitated tau pathology        | NA                                           | Heterozygous mice of 5×FAD and P301S          | Lodder et al., 2021      |
|                        | 30%                                             | Not affect tau pathology                                | No change in neuron loss or count            | Tg4510                                        | Bennett et al., 2018     |
|                        | 70–80%                                          | Reduce plaque deposition                                | NA                                           | 5×FAD                                         | Sosna et al., 2018       |
| <b>JNJ-527</b>         | 40%                                             | Attenuation of tau pathology                            | Reduction of neuronal cell death             | P301S                                         | Mancuso et al., 2019     |

|               |                       |                                                                    |                                   |         |                           |
|---------------|-----------------------|--------------------------------------------------------------------|-----------------------------------|---------|---------------------------|
| <b>GW2580</b> | 85%                   | Reduce the A $\beta$ plaques                                       | Reduction in the axonal pathology | APP/PS1 | Hu et al., 2021           |
|               | Significant reduction | Improve memory performance but not change amyloid- $\beta$ plaques | Prevent synaptic degeneration     | APP/PS1 | Olmos-Alonso et al., 2016 |

Notes: NA, not available. All references are listed in the main text.
